# Supplementary material for: Exceptionally dense and resilient critically jammed polydisperse disk packings
Source: Royal Society of Chemistry journal article supplement (doi:10.1039/d4sm00426d), 2024-01-01
Supplement: d4sm00426d2.xlsx [file d4sm00426d2.xlsx]

## Sheet: figure2
Panel b													Panel c
N=144				N=400				N=1024					N=144				N=400				N=1024
z_n	mean	std		z_n	mean	std		z_n	mean	std			z_n	mean	std		z_n	mean	std		z_n	mean	std
0	0.000756802	7.80625e-05		0	0.00072496	3.83774e-05		0	0.000728457	5.81515e-06			0	5.43472	0.0419486		0	5.43536	0.0245054		0	5.43438	0.0136004
0.25	0.000645422	5.33254e-05		0.25	0.000628097	2.73008e-05		0.25	0.000619506	1.44059e-05			0.125	5.4625	0.0334168		0.125	5.4685	0.0238106		0.125	5.47422	0.0202305
0.5	0.000582839	4.3528e-05		0.5	0.000569263	3.35771e-05		0.5	0.000567952	1.69239e-05			0.25	5.47083	0.031022		0.25	5.477	0.0217562		0.25	5.48457	0.0148303
0.75	0.000554795	4.69324e-05		0.75	0.00053218	4.05134e-05		0.75	0.000530233	1.87988e-05			0.375	5.4774	0.0331368		0.375	5.48688	0.0163867		0.375	5.4957	0.00813414
1	0.000518446	7.07497e-05		1	0.000502412	2.78271e-05		1	0.000491792	2.67522e-05			0.5	5.50694	0.0425574		0.5	5.50788	0.0228979		0.5	5.50488	0.0223498
1.25	0.000514502	5.09045e-05		1.25	0.000474419	2.09446e-05		1.25	0.000471153	5.65978e-06			0.625	5.5	0.0292803		0.625	5.53838	0.0246617		0.625	5.51582	0.0127395
1.5	0.000494966	5.56959e-05		1.5	0.000468071	3.97107e-05		1.5	0.000450577	1.52227e-05			0.75	5.51944	0.0560166		0.75	5.52188	0.0277282		0.75	5.5332	0.00991637
1.75	0.000505347	6.77059e-05		1.75	0.00045998	2.8734e-05		1.75	0.000450898	1.99677e-05			0.875	5.50972	0.0458544		0.875	5.545	0.0147196		0.875	5.53663	0.0147585
2	0.000516191	5.3877e-05		2	0.000458198	2.81968e-05		2	0.000455223	1.59101e-05			1	5.53714	0.0621259		1	5.542	0.0284019		1	5.54527	0.0180702
2.25	0.000489213	4.55875e-05		2.25	0.000463236	3.11985e-05		2.25	0.000435715	1.51252e-05			1.125	5.55	0.025526		1.125	5.54139	0.0189903		1.125	5.55645	0.0101466
2.5	0.000486471	5.61982e-05		2.5	0.00046159	3.11636e-05		2.5	0.000445066	2.05678e-05			1.25	5.5375	0.0532105		1.25	5.5655	0.0220416		1.25	5.54991	0.0139473
2.75	0.000491787	3.87639e-05		2.75	0.000456654	1.81045e-05		2.75	0.000439667	2.13715e-05			1.375	5.54861	0.0377535		1.375	5.54889	0.0177255		1.375	5.56797	0.0130793
3	0.000498882	3.66425e-05		3	0.000461055	2.52988e-05		3	0.000451544	1.95503e-05			1.5	5.55139	0.037066		1.5	5.55489	0.0283988		1.5	5.5732	0.0152022
3.25	0.000509063	6.2227e-05		3.25	0.000460411	2.83125e-05		3.25	0.000443677	2.25995e-05			1.625	5.52083	0.0301815		1.625	5.5605	0.0207431		1.625	5.57828	0.0128473
3.5	0.000501796	4.25902e-05		3.5	0.000477109	2.88925e-05		3.5	0.000449391	1.18623e-05			1.75	5.53611	0.0430331		1.75	5.56689	0.0165883		1.75	5.56945	0.0157805
3.75	0.000494461	5.29497e-05		3.75	0.000473491	2.40446e-05		3.75	0.000447339	1.40515e-05			1.875	5.5375	0.0327691		1.875	5.5665	0.0179583		1.875	5.57194	0.0178195
4	0.00050079	4.96124e-05		4	0.000463099	3.2932e-05		4	0.000441192	1.77277e-05			2	5.53577	0.0422381		2	5.559	0.0234284		2	5.56543	0.0112104
4.25	0.000469832	3.00275e-05		4.25	0.000429908	2.50805e-05		4.25	0.000447544	1.91166e-05			2.125	5.55139	0.0217642		2.125	5.5734	0.0264985		2.125	5.57773	0.00964773
4.5	0.000493129	2.77917e-05		4.5	0.000427402	2.81206e-05		4.5	0.00041862	1.20445e-05			2.25	5.54688	0.0312727		2.25	5.5705	0.0165747		2.25	5.5748	0.0172016
4.75	0.000453465	4.49586e-05		4.75	0.000414863	3.55909e-05		4.75	0.000413014	1.47961e-05			2.375	5.5483	0.0271224		2.375	5.56589	0.0216136		2.375	5.57441	0.0137013
5	0.000447449	3.66973e-05		5	0.000408565	3.09287e-05		5	0.000380775	1.73509e-05			2.5	5.54444	0.0480233		2.5	5.57689	0.0212399		2.5	5.5773	0.0142803
5.25	0.000408881	4.58696e-05		5.25	0.000381874	3.00474e-05		5.25	0.000371254	1.50396e-05			2.625	5.52917	0.0336724		2.625	5.5605	0.0207431		2.625	5.5732	0.0148613
5.5	0.000351994	3.93458e-05		5.5	0.000341015	2.57942e-05		5.5	0.000326529	1.34433e-05			2.75	5.55	0.0435284		2.75	5.56739	0.0126822		2.75	5.57363	0.0151862
5.625	0.000310668	5.25641e-05		5.625	0.000295831	1.21181e-05		5.625	0.000276258	1.40292e-05			2.875	5.55	0.0490828		2.875	5.577	0.0297396		2.875	5.57668	0.00988115
5.75	0.000219979	3.75632e-05		5.75	0.000191726	2.29417e-05		5.75	0.000193324	1.1594e-05			3	5.55833	0.0466652		3	5.564	0.0186786		3	5.57402	0.0178877
5.875	0.000138865	3.98789e-05		5.875	7.76752e-05	2.41556e-05		5.875	7.44785e-05	1.33223e-05			3.125	5.55694	0.0330297		3.125	5.568	0.0205751		3.125	5.56828	0.0188275
6	4.22045e-05	3.55275e-05		6	-2.9516e-05	2.86982e-05		6	-4.12315e-05	7.38269e-06			3.25	5.52361	0.0419486		3.25	5.5485	0.0173285		3.25	5.573	0.0133023
													3.375	5.54028	0.0491919		3.375	5.5635	0.0202827		3.375	5.56934	0.0121886
													3.5	5.54028	0.041123		3.5	5.5585	0.023458		3.5	5.57207	0.0113681
													3.625	5.5375	0.0540101		3.625	5.55	0.0305505		3.625	5.5689	0.0112716
													3.75	5.54167	0.0364537		3.75	5.544	0.016964		3.75	5.56406	0.0142874
													3.875	5.52917	0.034303		3.875	5.55289	0.0175013		3.875	5.55972	0.0134707
													4	5.54167	0.0381769		4	5.55239	0.0205698		4	5.56925	0.0186647
													4.125	5.525	0.0443092		4.125	5.56289	0.0293266		4.125	5.56992	0.0163358
													4.25	5.54861	0.0445264		4.25	5.569	0.0214476		4.25	5.55929	0.0152097
													4.375	5.55833	0.0407828		4.375	5.57	0.0209497		4.375	5.57031	0.0133106
													4.5	5.53581	0.0350759		4.5	5.57089	0.0259026		4.5	5.575	0.0161899
													4.625	5.55972	0.0321084		4.625	5.577	0.0265832		4.625	5.57637	0.0122302
													4.75	5.55972	0.0458544		4.75	5.57689	0.0172088		4.75	5.57652	0.0121326
													4.875	5.56667	0.0251879		4.875	5.573	0.0188856		4.875	5.57769	0.016004
													5	5.54861	0.0354099		5	5.578	0.0282056		5	5.59629	0.01878
													5.125	5.59306	0.0689955		5.125	5.595	0.0254951		5.125	5.60699	0.0139606
													5.25	5.59444	0.054307		5.25	5.5905	0.0215316		5.25	5.59937	0.0134829
													5.375	5.59028	0.0415379		5.375	5.614	0.00966092		5.375	5.62109	0.0139024
													5.5	5.62917	0.0278163		5.5	5.619	0.0142984		5.5	5.62891	0.010658
													5.625	5.68611	0.0228687		5.625	5.6705	0.0180201		5.625	5.67793	0.00989283
													5.75	5.775	0.0291336		5.75	5.78	0.0191485		5.75	5.7668	0.00829663
													5.875	5.87917	0.02623		5.875	5.892	0.0188856		5.875	5.89473	0.00473518
													6	5.90278	0.0596486		6	5.982	0.0158465		6	5.99258	0.00458511

## Sheet: figure3
Panel e																Panel f																Panel g																Panel h
N=144					N=400					N=1024						N=144					N=400					N=1024						N=144					N=400					N=1024						N=144
energy mean	energy std	\phi_c mean	\phi_c std		energy mean	energy std	\phi_c mean	\phi_c std		energy mean	energy std	\phi_c mean	\phi_c std			\phi_c mean	\phi_c std	mean	std		\phi_c mean	\phi_c std	mean	std		\phi_c mean	\phi_c std	mean	std			\phi_c mean	\phi_c std	mean	std		\phi_c mean	\phi_c std	mean	std		\phi_c mean	\phi_c std	mean	std			\phi_c mean	\phi_c std
0.000765461	6.25664e-05	0.846395	0.00243282		0.000737355	3.02083e-05	0.846348	0.000954706		0.000735272	2.29089e-05	0.84734	0.000939888			0.846395	0.00243282	0.553969	0.0206203		0.846348	0.000954706	0.556022	0.0111565		0.84734	0.000939888	0.557065	0.00871552			0.846395	0.00243282	0.126506	0.00692317		0.846348	0.000954706	0.124956	0.00338505		0.84734	0.000939888	0.123825	0.00226614			0.846395	0.00243282
0.000667046	4.62179e-05	0.848601	0.00221105		0.000652722	2.67115e-05	0.84943	0.00139801		0.000642439	1.75549e-05	0.849699	0.000753946			0.848601	0.00221105	0.557288	0.0216885		0.84943	0.00139801	0.558327	0.0125458		0.849699	0.000753946	0.558397	0.00894804			0.848601	0.00221105	0.123795	0.00717525		0.84943	0.00139801	0.124654	0.00423546		0.849699	0.000753946	0.1237	0.00247447			0.848601	0.00221105
0.000621745	6.10997e-05	0.850504	0.00267916		0.000605553	3.13531e-05	0.851921	0.00186633		0.000594092	2.18761e-05	0.852197	0.00105313			0.850504	0.00267916	0.561184	0.0222676		0.851921	0.00186633	0.556536	0.0114426		0.852197	0.00105313	0.564035	0.00973927			0.850504	0.00267916	0.121469	0.00654912		0.851921	0.00186633	0.123711	0.00396838		0.852197	0.00105313	0.124117	0.0024458			0.850504	0.00267916
0.000588813	5.29957e-05	0.852134	0.00300597		0.000577117	1.6268e-05	0.852733	0.0011055		0.000560251	1.74033e-05	0.853941	0.0008015			0.852134	0.00300597	0.563766	0.0184736		0.852733	0.0011055	0.571089	0.0156556		0.853941	0.0008015	0.566793	0.0075051			0.852134	0.00300597	0.122298	0.00575997		0.852733	0.0011055	0.121743	0.00446688		0.853941	0.0008015	0.122939	0.00201054			0.852134	0.00300597
0.000573119	4.69129e-05	0.853829	0.00292818		0.000546652	2.91197e-05	0.854954	0.00128938		0.000536853	1.71352e-05	0.855592	0.000952954			0.853829	0.00292818	0.566735	0.0220254		0.854954	0.00128938	0.569155	0.0145051		0.855592	0.000952954	0.571681	0.0102147			0.853829	0.00292818	0.123316	0.00583618		0.854954	0.00128938	0.122586	0.00390018		0.855592	0.000952954	0.122873	0.00260785			0.853829	0.00292818
0.000552538	5.91964e-05	0.854585	0.00267947		0.000519226	2.40556e-05	0.856764	0.00168625		0.000512176	1.84034e-05	0.857272	0.000991556			0.854585	0.00267947	0.563013	0.0295567		0.856764	0.00168625	0.569428	0.0125065		0.857272	0.000991556	0.571166	0.00707289			0.854585	0.00267947	0.122036	0.0077457		0.856764	0.00168625	0.122678	0.00364429		0.857272	0.000991556	0.122608	0.00258206			0.854585	0.00267947
0.000498248	5.32855e-05	0.859835	0.00347143		0.00045638	3.54704e-05	0.86323	0.00185797		0.000448539	2.10523e-05	0.863944	0.0013293			0.859835	0.00347143	0.568904	0.0192735		0.86323	0.00185797	0.577084	0.0111144		0.863944	0.0013293	0.577367	0.012277			0.859835	0.00347143	0.123497	0.00693308		0.86323	0.00185797	0.122095	0.00314205		0.863944	0.0013293	0.121502	0.00285998			0.859835	0.00347143
0.00044819	5.72239e-05	0.865602	0.00277472		0.000400788	2.47696e-05	0.869463	0.00155929		0.000390547	9.76086e-06	0.870198	0.000905198			0.865602	0.00277472	0.569864	0.0239039		0.869463	0.00155929	0.583033	0.0150676		0.870198	0.000905198	0.580867	0.00813016			0.865602	0.00277472	0.122204	0.00609198		0.869463	0.00155929	0.120117	0.00313858		0.870198	0.000905198	0.121241	0.00252664			0.865602	0.00277472
0.000408073	4.08458e-05	0.867199	0.00253734		0.000388055	2.69736e-05	0.870366	0.00238113		0.000376195	1.94587e-05	0.872217	0.0011641			0.867199	0.00253734	0.580092	0.0290513		0.870366	0.00238113	0.578139	0.0132003		0.872217	0.0011641	0.582235	0.0089892			0.867199	0.00253734	0.121663	0.00736773		0.870366	0.00238113	0.123105	0.00445795		0.872217	0.0011641	0.122019	0.00203683			0.867199	0.00253734
0.000405553	4.37841e-05	0.868522	0.00306709		0.000361487	2.58695e-05	0.872339	0.00249773		0.000349924	1.41149e-05	0.87369	0.00152497			0.868522	0.00306709	0.580325	0.0209736		0.872339	0.00249773	0.580605	0.0130815		0.87369	0.00152497	0.584101	0.00825341			0.868522	0.00306709	0.12264	0.00512933		0.872339	0.00249773	0.122736	0.0035924		0.87369	0.00152497	0.120982	0.00258215			0.868522	0.00306709
0.000372315	4.44897e-05	0.871092	0.00192135		0.000335669	3.12326e-05	0.874488	0.00228728		0.000322961	1.89391e-05	0.876721	0.0014615			0.871092	0.00192135	0.583061	0.0214727		0.874488	0.00228728	0.583797	0.0143826		0.876721	0.0014615	0.584065	0.0104834			0.871092	0.00192135	0.121573	0.00606043		0.874488	0.00228728	0.121567	0.00372283		0.876721	0.0014615	0.120975	0.00236129			0.871092	0.00192135
0.000343216	2.8714e-05	0.873267	0.0025741		0.000307189	2.49616e-05	0.876755	0.00183186		0.000300671	1.25555e-05	0.879404	0.00141409			0.873267	0.0025741	0.582058	0.0217606		0.876755	0.00183186	0.586034	0.0106228		0.879404	0.00141409	0.585067	0.00919454			0.873267	0.0025741	0.12161	0.00521305		0.876755	0.00183186	0.119807	0.00388468		0.879404	0.00141409	0.121845	0.00244207			0.873267	0.0025741
0.000301263	5.34466e-05	0.875081	0.00236685		0.000267332	2.09849e-05	0.880392	0.0018809		0.00025631	1.58717e-05	0.882551	0.00107401			0.875081	0.00236685	0.58819	0.0247329		0.880392	0.0018809	0.585001	0.0142172		0.882551	0.00107401	0.585993	0.0107761			0.875081	0.00236685	0.120708	0.00581642		0.880392	0.0018809	0.120636	0.00316484		0.882551	0.00107401	0.121332	0.00246343			0.875081	0.00236685
0.000225566	5.17038e-05	0.878795	0.00419784		0.000201713	1.97745e-05	0.883326	0.00174767		0.000193374	1.09974e-05	0.886156	0.00104419			0.878795	0.00419784	0.582804	0.0322396		0.883326	0.00174767	0.583923	0.010646		0.886156	0.00104419	0.583213	0.00876315			0.878795	0.00419784	0.123282	0.00655211		0.883326	0.00174767	0.121685	0.00234351		0.886156	0.00104419	0.121625	0.00229953			0.878795	0.00419784
0.000137455	5.14344e-05	0.882353	0.00360229		0.000125857	2.55039e-05	0.885632	0.00300762		0.00011626	1.18099e-05	0.887745	0.00186653			0.882353	0.00360229	0.575672	0.0270887		0.885632	0.00300762	0.578294	0.0135808		0.887745	0.00186653	0.582946	0.0119192			0.882353	0.00360229	0.124537	0.006361		0.885632	0.00300762	0.124194	0.00375993		0.887745	0.00186653	0.122961	0.00311474			0.882353	0.00360229
0.000160703	0.000123134	0.874631	0.0107022		5.73581e-05	2.78554e-05	0.885848	0.003732		4.15334e-05	1.28596e-05	0.888457	0.0027292			0.874631	0.0107022	0.57851	0.0273584		0.885848	0.003732	0.577637	0.0162207		0.888457	0.0027292	0.578436	0.00755536			0.874631	0.0107022	0.124235	0.00619369		0.885848	0.003732	0.125911	0.00389422		0.888457	0.0027292	0.12557	0.00193427			0.874631	0.0107022
3.3335e-05	4.16139e-05	0.881897	0.00400415		-2.34549e-05	2.42622e-05	0.888818	0.00291536		-4.25791e-05	1.3182e-05	0.891096	0.0016844			0.881897	0.00400415	0.590498	0.0285906		0.888818	0.00291536	0.595808	0.0150191		0.891096	0.0016844	0.596474	0.0111162			0.881897	0.00400415	0.120654	0.00521538		0.888818	0.00291536	0.121051	0.0037519		0.891096	0.0016844	0.120383	0.00273464			0.881897	0.00400415
[truncated: 10 more columns]

## Sheet: figure4
Panel a																Panel b																Panel c																Panel d
Gamma					Log-normal					Uniform						Gamma					Log-normal					Uniform						Gamma					Log-normal					Uniform						Gamma
energy mean	energy std	\phi_c mean	\phi_c std		energy mean	energy std	\phi_c mean	\phi_c std		energy mean	energy std	\phi_c mean	\phi_c std			\phi_c mean	\phi_c std	mean	std		\phi_c mean	\phi_c std	mean	std		\phi_c mean	\phi_c std	mean	std			\phi_c mean	\phi_c std	mean	std		\phi_c mean	\phi_c std	mean	std		\phi_c mean	\phi_c std	mean	std			\phi_c mean	\phi_c std
0.000731594	2.47812e-05	0.847213	0.000678328		0.000741204	2.01907e-05	0.847185	0.00077418		0.000717409	1.57812e-05	0.84736	0.000749362			0.847213	0.000678328	0.550988	0.00958565		0.847185	0.00077418	0.564901	0.00803011		0.84736	0.000749362	0.52535	0.00634316			0.847213	0.000678328	0.124539	0.00200542		0.847185	0.00077418	0.120363	0.0026133		0.84736	0.000749362	0.128385	0.00226447			0.847213	0.000678328
0.000641952	1.85937e-05	0.849834	0.000682554		0.00065922	1.26897e-05	0.849317	0.00062048		0.000630679	1.71383e-05	0.850156	0.000504523			0.849834	0.000682554	0.563129	0.00721864		0.849317	0.00062048	0.568736	0.00978807		0.850156	0.000504523	0.531315	0.0110887			0.849834	0.000682554	0.123186	0.00239408		0.849317	0.00062048	0.120934	0.00276167		0.850156	0.000504523	0.128862	0.00269863			0.849834	0.000682554
0.000596024	1.98395e-05	0.851979	0.00105836		0.000612148	1.96626e-05	0.851693	0.000838474		0.00058997	1.99928e-05	0.852016	0.000885417			0.851979	0.00105836	0.562092	0.00939634		0.851693	0.000838474	0.57595	0.00930123		0.852016	0.000885417	0.533236	0.00928641			0.851979	0.00105836	0.123757	0.00235923		0.851693	0.000838474	0.119982	0.00183102		0.852016	0.000885417	0.128548	0.00260459			0.851979	0.00105836
0.000559169	2.33562e-05	0.854064	0.00106374		0.000573315	1.69641e-05	0.853929	0.000902066		0.000554291	1.49792e-05	0.853943	0.000708512			0.854064	0.00106374	0.566942	0.010219		0.853929	0.000902066	0.577496	0.0118862		0.853943	0.000708512	0.535274	0.00839977			0.854064	0.00106374	0.122275	0.00261659		0.853929	0.000902066	0.120346	0.00234436		0.853943	0.000708512	0.128089	0.00225901			0.854064	0.00106374
0.000540339	1.54869e-05	0.855543	0.000748912		0.000545801	1.80061e-05	0.855251	0.000920979		0.000526445	1.93058e-05	0.855735	0.000907075			0.855543	0.000748912	0.574284	0.0089304		0.855251	0.000920979	0.581906	0.00775309		0.855735	0.000907075	0.536092	0.00886653			0.855543	0.000748912	0.121538	0.00131363		0.855251	0.000920979	0.119192	0.00150088		0.855735	0.000907075	0.128311	0.00225026			0.855543	0.000748912
0.000515401	1.82129e-05	0.857135	0.000943148		0.0005215	2.34183e-05	0.856991	0.00105767		0.000506771	1.94607e-05	0.857151	0.000883066			0.857135	0.000943148	0.572619	0.00818905		0.856991	0.00105767	0.584892	0.00807689		0.857151	0.000883066	0.537924	0.00720552			0.857135	0.000943148	0.122325	0.00156511		0.856991	0.00105767	0.119171	0.00216655		0.857151	0.000883066	0.128061	0.00263477			0.857135	0.000943148
0.000449834	2.38609e-05	0.863723	0.00142255		0.000458871	1.67428e-05	0.863379	0.00121133		0.000444194	1.94619e-05	0.862913	0.00106329			0.863723	0.00142255	0.577691	0.00889951		0.863379	0.00121133	0.593971	0.00695154		0.862913	0.00106329	0.541951	0.0091649			0.863723	0.00142255	0.121694	0.00219044		0.863379	0.00121133	0.117574	0.00170431		0.862913	0.00106329	0.127187	0.00217777			0.863723	0.00142255
0.000389689	1.53416e-05	0.87085	0.00102303		0.00039567	1.81361e-05	0.870195	0.00090225		0.000388102	2.14221e-05	0.868969	0.00124931			0.87085	0.00102303	0.580163	0.00830673		0.870195	0.00090225	0.595998	0.0106862		0.868969	0.00124931	0.545635	0.00809377			0.87085	0.00102303	0.121514	0.00224033		0.870195	0.00090225	0.118314	0.00221651		0.868969	0.00124931	0.12591	0.00226671			0.87085	0.00102303
0.000371657	2.30527e-05	0.872094	0.00149009		0.000376824	1.67686e-05	0.871598	0.0011121		0.000379366	1.83206e-05	0.869725	0.00115729			0.872094	0.00149009	0.584671	0.00992407		0.871598	0.0011121	0.594944	0.00918283		0.869725	0.00115729	0.549359	0.00833255			0.872094	0.00149009	0.121176	0.00239807		0.871598	0.0011121	0.118396	0.00210916		0.869725	0.00115729	0.126183	0.00202915			0.872094	0.00149009
0.000356468	1.38574e-05	0.873148	0.00110373		0.000367012	1.5607e-05	0.872675	0.00147923		0.00036109	1.5478e-05	0.870902	0.0015264			0.873148	0.00110373	0.585478	0.00863312		0.872675	0.00147923	0.594488	0.0101387		0.870902	0.0015264	0.545467	0.00846252			0.873148	0.00110373	0.120476	0.00198219		0.872675	0.00147923	0.118137	0.00244535		0.870902	0.0015264	0.126943	0.00126939			0.873148	0.00110373
0.000327541	1.41181e-05	0.876855	0.0011869		0.000340319	2.03409e-05	0.875461	0.00136032		0.000324564	1.4142e-05	0.873356	0.000974624			0.876855	0.0011869	0.5834	0.00573787		0.875461	0.00136032	0.598505	0.0109446		0.873356	0.000974624	0.545652	0.00706547			0.876855	0.0011869	0.121783	0.002193		0.875461	0.00136032	0.118665	0.00173546		0.873356	0.000974624	0.126328	0.00167903			0.876855	0.0011869
0.000295482	1.81406e-05	0.87944	0.00107055		0.000312224	1.60948e-05	0.878056	0.00144989		0.000305583	1.35345e-05	0.875065	0.000972303			0.87944	0.00107055	0.586536	0.00753313		0.878056	0.00144989	0.597474	0.00975495		0.875065	0.000972303	0.540329	0.00950187			0.87944	0.00107055	0.121131	0.00169656		0.878056	0.00144989	0.118416	0.0028286		0.875065	0.000972303	0.127092	0.00214517			0.87944	0.00107055
0.000255734	1.46384e-05	0.882204	0.00126265		0.000273665	1.24901e-05	0.880518	0.00143377		0.000269855	1.22709e-05	0.876667	0.00128183			0.882204	0.00126265	0.583918	0.00927758		0.880518	0.00143377	0.598892	0.00800474		0.876667	0.00128183	0.546197	0.00995957			0.882204	0.00126265	0.121556	0.00238975		0.880518	0.00143377	0.118249	0.00260621		0.876667	0.00128183	0.126787	0.0024497			0.882204	0.00126265
0.000190535	1.10606e-05	0.885855	0.00165911		0.000204886	1.34775e-05	0.884194	0.0017495		0.000209728	1.43209e-05	0.879348	0.00139737			0.885855	0.00165911	0.586399	0.0100133		0.884194	0.0017495	0.59636	0.00950338		0.879348	0.00139737	0.544875	0.0078116			0.885855	0.00165911	0.121624	0.00232866		0.884194	0.0017495	0.119932	0.00215794		0.879348	0.00139737	0.127262	0.00219918			0.885855	0.00165911
0.000120524	1.68103e-05	0.887738	0.00154844		0.000138366	1.44275e-05	0.884824	0.00168048		0.000143719	1.61465e-05	0.88104	0.00174797			0.887738	0.00154844	0.578731	0.00985418		0.884824	0.00168048	0.596332	0.0102701		0.88104	0.00174797	0.541987	0.00760617			0.887738	0.00154844	0.124998	0.00249677		0.884824	0.00168048	0.120069	0.00263868		0.88104	0.00174797	0.128763	0.0023914			0.887738	0.00154844
4.12586e-05	1.33633e-05	0.887698	0.00257335		5.99987e-05	1.68008e-05	0.886197	0.00167477		6.23672e-05	1.90504e-05	0.882616	0.00206389			0.887698	0.00257335	0.583716	0.00881372		0.886197	0.00167477	0.59865	0.0105345		0.882616	0.00206389	0.546211	0.0100141			0.887698	0.00257335	0.124273	0.00228887		0.886197	0.00167477	0.120945	0.00273197		0.882616	0.00206389	0.128941	0.00245282			0.887698	0.00257335
-4.50513e-05	1.18847e-05	0.891364	0.0019923		-2.07857e-05	1.36387e-05	0.888613	0.00131734		-9.54413e-06	1.6284e-05	0.883271	0.00176119			0.891364	0.0019923	0.60099	0.0125898		0.888613	0.00131734	0.610239	0.0076892		0.883271	0.00176119	0.556825	0.00998642			0.891364	0.0019923	0.119859	0.00295589		0.888613	0.00131734	0.11724	0.00167417		0.883271	0.00176119	0.124741	0.00229809			0.891364	0.0019923
[truncated: 10 more columns]

## Sheet: figure5
Panel c						Panel f
						Low packing fraction states				High packing fraction states
\phi_c mean	\phi_c std	mean	std			\gamma	mean	std		\gamma	mean	std
0.846343	0.000954701	0.303863	0.0733307			0	0	0		0	0	0
0.849426	0.001398	0.230385	0.027483			0.005	0.0309899	0.012733		0.005	0.0107468	0.00847255
0.851917	0.00186632	0.22671	0.0384491			0.01	0.0598272	0.021972		0.01	0.0132199	0.00926743
0.852728	0.00110549	0.201076	0.0293605			0.015	0.120671	0.0409597		0.015	0.0143692	0.00948536
0.85495	0.00128937	0.175164	0.0177681			0.02	0.142761	0.052412		0.02	0.0150285	0.00956189
0.85676	0.00168624	0.163781	0.0236454			0.025	0.190953	0.0666779		0.025	0.0147846	0.0102528
0.863225	0.00185796	0.107199	0.00785408			0.03	0.21941	0.0720621		0.03	0.0124712	0.00809766
0.869458	0.00155928	0.0921416	0.00531579			0.035	0.258202	0.0674063		0.035	0.0185321	0.0278127
0.870361	0.00238112	0.0961562	0.0189809			0.04	0.295556	0.0828689		0.04	0.022444	0.0283636
0.872334	0.00249772	0.0915151	0.0111205			0.045	0.350269	0.0876072		0.045	0.0281955	0.0351212
0.874484	0.00228727	0.0859226	0.0107929			0.05	0.389677	0.101437		0.05	0.0628598	0.12002
0.876751	0.00183185	0.0816133	0.0122069			0.055	0.451129	0.0949879		0.055	0.102527	0.167968
0.880388	0.00188089	0.0705792	0.00478124			0.06	0.468603	0.105583		0.06	0.125438	0.167434
0.883321	0.00174767	0.0633581	0.0068338			0.065	0.553371	0.137564		0.065	0.124042	0.167363
0.885628	0.0030076	0.0593919	0.0112547			0.07	0.602355	0.112428		0.07	0.198462	0.202292
0.885843	0.00373198	0.0710625	0.0203901			0.075	0.604434	0.122586		0.075	0.284852	0.253162
0.888813	0.00291535	0.0648585	0.0107244			0.08	0.61988	0.101625		0.08	0.240449	0.214592
						0.085	0.663445	0.0789802		0.085	0.33501	0.309182
						0.09	0.725749	0.128185		0.09	0.503948	0.357622
						0.095	0.772582	0.119777		0.095	0.483544	0.339871
						0.1	0.804291	0.12589		0.1	0.495074	0.325805
